# Supplementary material
Source: Springer Nature journal article supplement (https://www.springermedizin.de/resource/supplementary/12879_2012_2376_MOESM1_ESM.pdf/9444476)

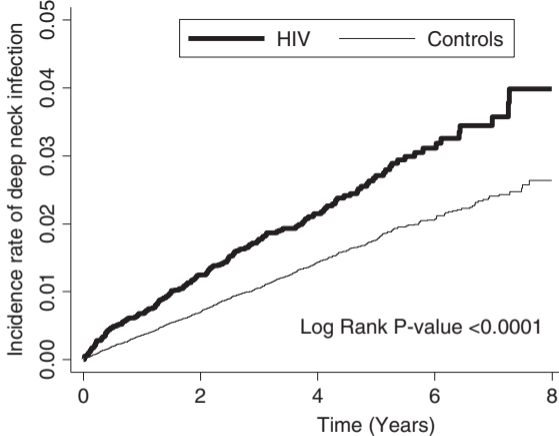

Number at risk

|          |       |       |       |      |   |
|----------|-------|-------|-------|------|---|
| HIV      | 9888  | 9296  | 3688  | 1401 | 0 |
| Controls | 49440 | 48972 | 20302 | 7864 | 0 |

Supplement: MOESM1 [file 9444476]
